# Supplementary material for: Comprehensive Analysis of the Tumor Immune Microenvironment Landscape in Glioblastoma Reveals Tumor Heterogeneity and Implications for Prognosis and Immunotherapy
Source: Front Immunol. 2022 Mar 2;13:820673. doi: 10.3389/fimmu.2022.820673 (PMC8924366; doi:10.3389/fimmu.2022.820673)
Supplement: Supplementary file 5 [file Table_5.xlsx]

## Sheet: Table S20A_ACC
rank	cmap name	mean	n	enrichment	p	specificity	percent non-null
1	irinotecan	-0.921	3	-0.999	0	0	100
2	GW-8510	-0.74	4	-0.993	0	0.0076	100
3	camptothecin	-0.769	3	-0.986	0	0.0568	100
4	alsterpaullone	-0.721	3	-0.985	0	0.0286	100
5	trichostatin A	0.304	182	0.428	0	0.4455	67
6	tanespimycin	0.295	62	0.372	0	0.2021	61
7	thioridazine	0.309	20	0.457	0.00022	0.3425	70
8	methotrexate	-0.335	8	-0.684	0.00032	0.0069	62
9	SC-560	0.572	3	0.939	0.00034	0	100
10	guaifenesin	-0.345	6	-0.74	0.00066	0.0052	66
11	daunorubicin	-0.55	4	-0.858	0.0007	0.0175	100
12	rifabutin	0.563	3	0.914	0.00136	0.0469	100
13	harmine	-0.384	4	-0.83	0.00151	0.0055	75
14	apigenin	-0.282	4	-0.83	0.00151	0.0217	50
15	zimeldine	-0.364	5	-0.757	0.00154	0.0055	80
16	doxorubicin	-0.594	3	-0.906	0.00162	0.0977	100
17	ellipticine	-0.487	4	-0.828	0.00165	0.0229	75
18	6-bromoindirubin-3'-oxime	-0.396	7	-0.627	0.00341	0.0794	71
19	0175029-0000	-0.382	6	-0.667	0.00377	0.0916	66
20	doxylamine	0.499	5	0.719	0.00397	0.024	80
21	geldanamycin	0.306	15	0.431	0.00447	0.2989	66
22	MG-262	0.514	3	0.863	0.00481	0.1946	100
23	pralidoxime	0.47	4	0.768	0.00561	0.0142	100
24	esculetin	0.505	3	0.847	0.00691	0.0128	100
25	15-delta prostaglandin J2	0.276	15	0.417	0.00705	0.3631	66
26	scriptaid	0.511	3	0.844	0.00743	0.1157	100
27	resveratrol	-0.239	9	-0.524	0.00761	0.1667	66
28	prochlorperazine	0.282	16	0.399	0.00766	0.3495	62
29	sulfaquinoxaline	-0.386	3	-0.843	0.00773	0.0185	100
30	disulfiram	0.405	5	0.678	0.00883	0.1098	80
31	parthenolide	-0.256	4	-0.732	0.0104	0.1035	50
32	spaglumic acid	-0.503	2	-0.929	0.0106	0.0215	100
33	harmol	-0.527	4	-0.73	0.01062	0.0656	75
34	famotidine	-0.373	5	-0.66	0.01079	0	80
35	H-7	-0.425	4	-0.711	0.01416	0.3712	75
36	0297417-0002B	0.468	3	0.808	0.01422	0.1211	100
37	chlorhexidine	0.347	5	0.651	0.0143	0.0056	80
38	MS-275	0.629	2	0.914	0.01443	0.1255	100
39	mitoxantrone	-0.462	3	-0.8	0.01626	0.1064	66
40	prednisone	0.343	5	0.643	0.01634	0.0351	60
41	vorinostat	0.224	12	0.421	0.01808	0.6181	58
42	piromidic acid	-0.361	4	-0.696	0.0181	0.0374	75
43	CP-863187	-0.494	4	-0.689	0.02009	0.0471	75
44	aminocaproic acid	-0.259	3	-0.782	0.02127	0.0204	66
45	homochlorcyclizine	0.404	4	0.683	0.02166	0.0761	75
46	pyrimethamine	0.407	5	0.623	0.02237	0.0617	80
47	molindone	0.529	4	0.679	0.02284	0.025	75
48	dicycloverine	0.465	5	0.62	0.02341	0.0387	80
49	puromycin	0.432	4	0.675	0.02445	0.2921	75
50	clindamycin	0.398	5	0.615	0.02493	0.029	80
51	STOCK1N-35874	-0.484	2	-0.888	0.02511	0.0596	100
52	fludroxycortide	0.284	5	0.615	0.02527	0.0159	80
53	enilconazole	-0.282	4	-0.673	0.02544	0.0062	75
54	perhexiline	0.428	4	0.67	0.02612	0.1451	75
55	benzamil	0.273	6	0.56	0.02713	0.0637	66
56	5224221	0.548	2	0.885	0.02734	0.2626	100
57	diethylstilbestrol	0.272	6	0.559	0.02781	0.2053	66
58	hycanthone	-0.398	4	-0.665	0.02851	0.0504	75
59	calmidazolium	0.486	2	0.881	0.02875	0.1368	100
60	scoulerine	-0.229	4	-0.661	0.0298	0.0168	75
61	dihydroergocristine	0.242	4	0.66	0.03046	0.1099	50
62	neomycin	-0.277	5	-0.596	0.03116	0.0479	60
63	quinidine	-0.274	3	-0.751	0.03165	0.0301	66
64	loperamide	0.296	6	0.547	0.03276	0.1869	66
65	cobalt chloride	0.348	3	0.743	0.03323	0.0216	100
66	ivermectin	0.382	5	0.593	0.03467	0.1452	80
67	desipramine	0.338	4	0.65	0.03565	0.1474	75
68	folic acid	-0.351	4	-0.649	0.03571	0.0882	75
69	alvespimycin	0.321	12	0.388	0.0365	0.2931	58
70	prilocaine	-0.217	6	-0.542	0.03669	0.0423	50
71	piperine	-0.379	4	-0.645	0.0377	0.0118	75
72	CP-944629	-0.454	4	-0.644	0.03839	0.0659	75
73	proguanil	0.368	3	0.73	0.03858	0.0565	66
74	phenoxybenzamine	-0.235	4	-0.641	0.03975	0.2636	50
75	ambroxol	0.306	4	0.637	0.04245	0.1503	50
76	meclocycline	-0.358	4	-0.633	0.04424	0.0303	75
77	mianserin	0.349	5	0.574	0.0444	0.0667	80
78	etynodiol	-0.344	4	-0.631	0.04563	0.0199	75
79	mercaptopurine	-0.377	2	-0.848	0.04648	0.0274	100
80	ethoxyquin	0.39	5	0.568	0.04806	0.0402	80
81	nimesulide	0.404	4	0.625	0.04971	0.0382	75

## Sheet: Table S20A_BLCA
rank	cmap name	mean	n	enrichment	p	specificity	percent non-null
1	meteneprost	-0.591	4	-0.939	0	0	100
2	tanespimycin	0.57	62	0.621	0	0.0155	79
3	alvespimycin	0.591	12	0.641	6e-05	0.0115	75
4	geldanamycin	0.544	15	0.555	8e-05	0.1304	73
5	finasteride	-0.362	6	-0.8	0.00016	0	66
6	etiocholanolone	-0.464	6	-0.77	0.00026	0.0065	83
7	alpha-estradiol	0.43	16	0.501	0.00028	0.0233	68
8	diphenylpyraline	-0.338	6	-0.716	0.00107	0.0063	83
9	MG-262	0.579	3	0.908	0.00166	0.1514	100
10	5224221	0.767	2	0.965	0.00207	0.1285	100
11	methylergometrine	0.577	4	0.815	0.00219	0	100
12	sulfamonomethoxine	-0.316	4	-0.793	0.00368	0.0066	50
13	sulfadoxine	0.584	3	0.873	0.00371	0	100
14	Prestwick-1103	-0.303	4	-0.782	0.00454	0.0265	50
15	cisapride	0.37	4	0.777	0.00464	0	75
16	PF-00539745-00	-0.26	3	-0.851	0.00659	0.0593	66
17	felbinac	-0.29	4	-0.761	0.00676	0.1206	50
18	pioglitazone	-0.305	11	-0.484	0.0068	0.097	54
19	folic acid	-0.273	4	-0.756	0.00722	0.0294	50
20	cephaeline	-0.424	5	-0.683	0.00735	0.2771	80
21	AH-23848	0.531	3	0.842	0.00785	0	100
22	iopromide	-0.401	4	-0.749	0.00794	0.0074	75
23	phenazone	-0.245	3	-0.841	0.00807	0.0173	66
24	meptazinol	0.442	4	0.744	0.0081	0.0158	75
25	beta-escin	0.337	6	0.615	0.01005	0.0942	66
26	canadine	-0.357	4	-0.733	0.01017	0.0805	50
27	pheneticillin	-0.276	4	-0.728	0.01112	0.0327	50
28	serotonin	0.47	5	0.664	0.01135	0	80
29	nadolol	-0.377	4	-0.721	0.01239	0.1769	50
30	gentamicin	-0.245	4	-0.72	0.01251	0.0921	50
31	lorglumide	0.508	5	0.657	0.01284	0.0256	80
32	chenodeoxycholic acid	-0.306	4	-0.713	0.01369	0.0923	50
33	hydrocortisone	0.349	3	0.809	0.01416	0.0063	66
34	florfenicol	0.247	4	0.709	0.01472	0.0131	50
35	vancomycin	-0.268	4	-0.7	0.01685	0.0621	50
36	desipramine	0.341	4	0.699	0.01695	0.0579	75
37	urapidil	0.399	4	0.699	0.01701	0	75
38	ikarugamycin	-0.438	3	-0.797	0.01719	0.0227	66
39	alfuzosin	0.296	5	0.637	0.018	0.0156	60
40	carbachol	0.561	4	0.683	0.0218	0.0288	75
41	doxylamine	0.42	5	0.624	0.02205	0.048	80
42	norethisterone	0.343	4	0.681	0.0221	0.0608	50
43	racecadotril	-0.376	4	-0.683	0.02216	0.0192	75
44	alprostadil	-0.209	7	-0.527	0.02373	0.096	57
45	CP-863187	-0.45	4	-0.677	0.02397	0.0529	75
46	puromycin	0.414	4	0.674	0.02475	0.3034	75
47	furazolidone	-0.288	4	-0.675	0.02505	0.0446	50
48	vanoxerine	-0.361	4	-0.673	0.0255	0.0417	75
49	mebeverine	-0.378	4	-0.67	0.02668	0.0359	75
50	josamycin	-0.274	5	-0.604	0.02742	0.0533	60
51	carteolol	-0.268	4	-0.666	0.02823	0.0355	50
52	eticlopride	-0.258	4	-0.662	0.0292	0.0833	50
53	lasalocid	-0.316	4	-0.653	0.03364	0.1574	50
54	oxaprozin	0.427	6	0.545	0.03373	0.0294	66
55	levobunolol	-0.303	4	-0.652	0.03467	0.1346	50
56	BCB000040	-0.429	4	-0.651	0.03517	0.0219	75
57	Prestwick-664	0.255	6	0.542	0.03536	0.036	50
58	pronetalol	0.239	4	0.648	0.03654	0.0179	50
59	brinzolamide	-0.164	4	-0.642	0.03917	0.0703	50
60	promazine	0.233	6	0.535	0.03965	0.0706	50
61	amantadine	-0.309	4	-0.632	0.0444	0.1765	50
62	lovastatin	-0.317	4	-0.63	0.04573	0.062	50
63	bumetanide	-0.208	4	-0.628	0.04691	0.1689	50
64	suloctidil	0.206	4	0.629	0.04768	0.3046	50

## Sheet: Table S20A_BRCA
rank	cmap name	mean	n	enrichment	p	specificity	percent non-null
1	tanespimycin	0.477	62	0.445	0	0.1036	79
2	fludrocortisone	-0.304	8	-0.68	0.0004	0.0211	50
3	PHA-00745360	-0.439	8	-0.659	0.0007	0.0078	75
4	CP-320650-01	-0.312	8	-0.647	0.00092	0.0216	62
5	amantadine	-0.603	4	-0.85	0.00095	0.0065	100
6	iopromide	-0.498	4	-0.83	0.00155	0.0074	100
7	finasteride	-0.321	6	-0.684	0.00256	0.061	50
8	timolol	-0.495	4	-0.809	0.00259	0.0149	75
9	Prestwick-691	-0.632	3	-0.885	0.00298	0.0263	100
10	sulfamonomethoxine	-0.452	4	-0.802	0.00298	0.0066	75
11	vinblastine	-0.622	3	-0.884	0.00306	0.0382	100
12	gentamicin	-0.464	4	-0.796	0.0034	0.0461	75
13	vincamine	-0.348	6	-0.663	0.00407	0.0412	66
14	etiocholanolone	-0.413	6	-0.661	0.00419	0.1169	66
15	alvespimycin	0.522	12	0.482	0.00457	0.1207	83
16	levomepromazine	-0.492	4	-0.771	0.00559	0.0094	75
17	monensin	-0.402	6	-0.641	0.00618	0.1382	66
18	tretinoin	0.26	22	0.349	0.00646	0.1591	54
19	cefamandole	-0.465	4	-0.759	0.00688	0.0083	75
20	beta-escin	0.492	6	0.637	0.00691	0.0681	100
21	sulfaquinoxaline	-0.5	3	-0.845	0.00747	0.0185	100
22	xamoterol	-0.655	3	-0.844	0.00761	0.0274	100
23	cloxacillin	-0.427	4	-0.749	0.00786	0.0242	75
24	atractyloside	-0.342	5	-0.673	0.00873	0.0682	60
25	calcium folinate	-0.487	5	-0.672	0.00883	0.0611	80
26	guanadrel	-0.364	5	-0.652	0.01258	0.0725	60
27	DL-thiorphan	0.844	2	0.92	0.01272	0.0515	100
28	diphenylpyraline	-0.309	6	-0.606	0.01277	0.05	66
29	guanabenz	-0.32	5	-0.648	0.0132	0.1077	60
30	biperiden	-0.405	5	-0.647	0.01348	0.2313	60
31	geldanamycin	0.455	15	0.392	0.01364	0.3967	73
32	blebbistatin	0.735	2	0.916	0.01414	0.0183	100
33	pyrvinium	0.524	6	0.591	0.01532	0.293	83
34	oxetacaine	0.512	5	0.639	0.01746	0.0424	100

## Sheet: Table S20A_CESC
rank	cmap name	mean	n	enrichment	p	specificity	percent non-null
1	CP-863187	-0.724	4	-0.975	0	0	100
2	tanespimycin	0.486	62	0.445	0	0.1036	80
3	trichostatin A	0.305	182	0.334	0	0.6351	60
4	puromycin	0.754	4	0.906	8e-05	0.0674	100
5	Prestwick-1103	-0.535	4	-0.884	0.0004	0	100
6	guanadrel	-0.337	5	-0.824	0.00042	0	80
7	6-bromoindirubin-3'-oxime	-0.46	7	-0.71	0.00042	0.0327	85
8	cloxacillin	-0.491	4	-0.878	0.00052	0	100
9	perhexiline	0.656	4	0.856	0.00056	0.0207	100
10	meteneprost	-0.61	4	-0.863	0.00064	0	100
11	cicloheximide	0.678	4	0.839	0.00107	0.0678	100
12	geldanamycin	0.502	15	0.474	0.0013	0.2337	80
13	5194442	-0.449	4	-0.832	0.00145	0.0127	100
14	adiphenine	-0.427	5	-0.745	0.00202	0.1371	60
15	myosmine	-0.287	6	-0.689	0.00219	0	66
16	clioquinol	0.562	5	0.743	0.0025	0.0471	100
17	ceforanide	-0.417	4	-0.799	0.00316	0.012	75
18	chloropyrazine	-0.339	4	-0.799	0.00318	0.0195	75
19	etofylline	0.549	5	0.731	0.00318	0	100
20	meptazinol	0.723	4	0.795	0.00348	0	100
21	indoprofen	-0.372	4	-0.795	0.0035	0.0333	75
22	thioridazine	0.322	20	0.387	0.00355	0.5571	60
23	pioglitazone	-0.356	11	-0.511	0.0036	0.0727	63
24	rottlerin	0.722	3	0.87	0.00403	0.0985	100
25	DL-thiorphan	0.747	2	0.952	0.0041	0	100
26	sulfaquinoxaline	-0.474	3	-0.873	0.00415	0.0185	100
27	thiamphenicol	-0.332	5	-0.711	0.00433	0.0733	60
28	ornidazole	0.473	5	0.714	0.00441	0	100
29	azapropazone	-0.582	3	-0.864	0.00511	0	100
30	diloxanide	-0.368	4	-0.777	0.00511	0	75
31	viomycin	-0.459	4	-0.777	0.00511	0.1223	75
32	trifluoperazine	0.332	16	0.408	0.00638	0.3942	62
33	trazodone	0.67	3	0.847	0.00679	0.0522	100
34	5255229	0.78	2	0.94	0.0068	0	100
35	CP-320650-01	-0.24	8	-0.555	0.00748	0.1151	50
36	bretylium tosilate	-0.363	4	-0.753	0.00752	0.011	75
37	alvespimycin	0.526	12	0.461	0.00792	0.1379	83
38	fludrocortisone	-0.183	8	-0.551	0.008	0.2254	50
39	harmol	-0.505	4	-0.748	0.00802	0.0492	75
40	flufenamic acid	0.495	6	0.626	0.0085	0.0219	100
41	prochlorperazine	0.392	16	0.396	0.00856	0.3592	68
42	pentoxifylline	-0.383	5	-0.671	0.00897	0.0448	80
43	tetracycline	-0.408	5	-0.662	0.01035	0.044	80
44	antimycin A	0.58	5	0.669	0.01051	0.0674	100
45	imipramine	0.575	4	0.728	0.01088	0.0229	100
46	liothyronine	0.563	4	0.727	0.01112	0.0252	100
47	BCB000040	-0.401	4	-0.724	0.0118	0.0073	75
48	blebbistatin	0.722	2	0.922	0.01217	0.0122	100
49	CP-944629	-0.426	4	-0.722	0.01219	0.0165	75
50	emetine	0.574	4	0.714	0.01361	0.2676	100
51	acemetacin	-0.33	4	-0.711	0.0141	0.0522	50
52	5224221	0.728	2	0.914	0.01459	0.2235	100
53	amantadine	-0.466	4	-0.708	0.01486	0.0719	75
54	3-acetamidocoumarin	-0.289	4	-0.704	0.01589	0.1688	50
55	ifenprodil	0.582	4	0.704	0.01603	0.0362	100
56	etiocholanolone	-0.176	6	-0.592	0.01613	0.2143	50
57	pyrazinamide	0.544	4	0.703	0.01615	0.0158	100
58	milrinone	0.668	3	0.798	0.01709	0.0159	100
59	lisinopril	0.614	3	0.796	0.01731	0	100
60	chloroquine	0.484	4	0.693	0.01856	0	100
61	Y-27632	0.676	2	0.904	0.01889	0.0233	100
62	clomipramine	0.567	4	0.69	0.01932	0.1216	100
63	cefalotin	0.47	4	0.689	0.01936	0	100
64	ambroxol	-0.305	4	-0.69	0.01987	0.0881	50
65	phenindione	0.542	4	0.688	0.01991	0.0079	100
66	pyrvinium	0.486	6	0.578	0.01998	0.3209	66
67	trapidil	-0.304	3	-0.785	0.02035	0.0432	66
68	5252917	0.742	2	0.9	0.02036	0.0274	100
69	triflusal	0.632	3	0.783	0.02083	0.0684	100
70	sulfamonomethoxine	-0.307	4	-0.686	0.02095	0.0861	50
71	drofenine	0.536	4	0.684	0.02148	0.0196	100
72	calmidazolium	0.691	2	0.895	0.02296	0.1211	100
73	PF-00539745-00	-0.176	3	-0.775	0.02324	0.0815	66
74	lycorine	0.535	5	0.617	0.02415	0.2716	100
75	cloperastine	0.444	6	0.564	0.02557	0.1814	83
76	ivermectin	0.488	5	0.613	0.02611	0.129	80
77	Prestwick-967	-0.422	4	-0.671	0.0262	0.044	75
78	spaglumic acid	-0.526	2	-0.885	0.0263	0.0645	100
79	monensin	-0.26	6	-0.561	0.02692	0.2276	50
80	SB-203580	-0.243	5	-0.605	0.02702	0.0556	60
81	4,5-dianilinophthalimide	0.654	2	0.883	0.02789	0.0407	100
82	indapamide	-0.128	6	-0.558	0.02807	0.0114	50
83	hyoscyamine	0.526	5	0.607	0.02852	0.0318	100
84	disulfiram	0.508	5	0.604	0.02942	0.237	100
85	loperamide	0.454	6	0.552	0.03031	0.1717	83
86	pivampicillin	0.508	4	0.66	0.03069	0.032	100
87	roxarsone	0.442	4	0.659	0.03105	0.0095	100
88	nomegestrol	-0.404	3	-0.752	0.03137	0.0441	66
89	nabumetone	0.465	4	0.657	0.03191	0.039	100
90	monorden	0.257	22	0.296	0.03356	0.2513	50
91	albendazole	0.59	3	0.741	0.03379	0.0581	100
92	tomatidine	0.396	4	0.653	0.0338	0.0137	75
93	doxylamine	0.541	5	0.592	0.03491	0.064	100
94	cefamandole	-0.278	4	-0.65	0.03543	0.0833	50
95	benzocaine	-0.277	4	-0.649	0.03557	0.1477	50
96	PNU-0251126	-0.301	6	-0.544	0.03576	0.1067	66
97	sulfadoxine	0.587	3	0.736	0.03583	0.0376	100
98	anisomycin	0.5	4	0.649	0.03591	0.433	75
99	methyldopate	-0.437	4	-0.648	0.03625	0.1022	75
100	protriptyline	0.548	4	0.646	0.0374	0.0894	100
101	fenoterol	0.536	3	0.729	0.0392	0.0629	100
102	atractyloside	-0.226	5	-0.579	0.03933	0.1591	60
103	mefloquine	0.501	5	0.581	0.03995	0.2647	80
104	rimexolone	0.519	4	0.642	0.04018	0.1177	100
105	harpagoside	-0.334	4	-0.639	0.04048	0.0764	75
106	vincamine	-0.163	6	-0.534	0.0411	0.1706	50
107	merbromin	-0.309	5	-0.575	0.04157	0.2032	60
108	chlorpromazine	0.296	19	0.308	0.04322	0.1859	57
109	fluorocurarine	0.437	4	0.635	0.04337	0.0165	100
110	imipenem	0.511	4	0.635	0.04351	0.0458	100
111	16-phenyltetranorprostaglandin E2	-0.246	4	-0.633	0.04406	0.0536	50
112	promazine	0.196	6	0.528	0.04406	0.0824	50
113	8-azaguanine	0.501	4	0.634	0.04416	0.2959	75
114	folic acid	-0.428	4	-0.631	0.04538	0.1324	75
115	sulfadiazine	0.462	5	0.571	0.04618	0.0082	80
116	benzbromarone	-0.337	3	-0.717	0.04645	0.1195	66
117	gabexate	-0.257	4	-0.627	0.04748	0.2013	50

## Sheet: Table S20A_CHOL
rank	cmap name	mean	n	enrichment	p	specificity	percent non-null
1	tanespimycin	0.472	62	0.388	0	0.1814	75
2	CP-320650-01	-0.415	8	-0.713	0.00012	0.0072	87
3	alvespimycin	0.514	12	0.55	0.00048	0.046	83
4	gentamicin	-0.472	4	-0.824	0.00181	0.0329	100
5	0175029-0000	0.564	6	0.702	0.00183	0.1471	100
6	Prestwick-1103	-0.493	4	-0.819	0.00203	0	100
7	methoxamine	-0.552	4	-0.814	0.00221	0.0065	100
8	PHA-00745360	-0.49	8	-0.611	0.00221	0.0543	75
9	genistein	-0.169	17	-0.432	0.0024	0.0929	52
10	benzocaine	-0.538	4	-0.808	0.00265	0.0134	100
11	ketotifen	-0.486	4	-0.803	0.00292	0.0082	100
12	mebendazole	0.608	5	0.727	0.00346	0.0766	100
13	vidarabine	0.674	4	0.782	0.0042	0.0066	100
14	acetylsalicylic acid	0.458	13	0.465	0.00435	0.008	76
15	cefamandole	-0.377	4	-0.78	0.00487	0.0083	75
16	finasteride	-0.324	6	-0.648	0.0052	0.1098	66
17	nomegestrol	-0.554	3	-0.863	0.00525	0	100
18	timolol	-0.354	4	-0.764	0.00633	0.0224	50
19	etiocholanolone	-0.248	6	-0.632	0.00747	0.1494	50
20	ethaverine	0.567	4	0.749	0.00762	0.0194	100
21	sulfanilamide	0.58	4	0.744	0.00804	0	100
22	geldanamycin	0.503	15	0.41	0.00851	0.337	80
23	folic acid	-0.426	4	-0.742	0.00879	0.0368	75
24	Gly-His-Lys	-0.515	3	-0.833	0.00931	0.0522	100
25	atropine methonitrate	0.645	3	0.83	0.00979	0	100
26	levcycloserine	0.588	4	0.733	0.00989	0.0085	100
27	monensin	-0.27	6	-0.619	0.00991	0.1626	50
28	sparteine	0.559	4	0.729	0.01076	0	100
29	memantine	-0.388	4	-0.719	0.01255	0.0242	75
30	griseofulvin	0.531	5	0.657	0.0127	0	100
31	etynodiol	-0.286	4	-0.715	0.01339	0.0133	50
32	tretinoin	0.297	22	0.326	0.0137	0.2557	63
33	5230742	-0.65	2	-0.916	0.01424	0.0164	100
34	myosmine	-0.261	6	-0.597	0.0149	0.0553	50
35	medrysone	0.525	6	0.592	0.015	0.1575	83
36	metronidazole	-0.394	5	-0.641	0.01508	0.0759	60
37	prenylamine	0.562	4	0.707	0.01528	0.2069	100
38	methyldopate	-0.49	4	-0.702	0.01647	0.0365	75
39	amantadine	-0.525	4	-0.699	0.01717	0.0719	75
40	trimethobenzamide	-0.354	5	-0.632	0.01724	0.0872	60
41	metampicillin	-0.309	5	-0.63	0.01782	0.087	80
42	milrinone	0.652	3	0.792	0.01821	0.0238	100
43	triamterene	-0.263	5	-0.628	0.01852	0.0429	80
44	fludroxycortide	0.535	5	0.627	0.02085	0.0159	80
45	ikarugamycin	-0.517	3	-0.782	0.02117	0.0455	66
46	ivermectin	0.521	5	0.624	0.02181	0.1183	100
47	buspirone	0.507	4	0.681	0.02238	0	100
48	CP-863187	-0.385	4	-0.681	0.02248	0.0529	75
49	Prestwick-691	-0.453	3	-0.778	0.02249	0.1316	66
50	doxycycline	-0.407	5	-0.617	0.02251	0.0283	60
51	gabexate	-0.348	4	-0.681	0.02274	0.1169	75
52	cyproterone	0.6	4	0.679	0.02308	0.024	100
53	asiaticoside	0.537	4	0.678	0.02322	0.0126	100
54	flunisolide	0.513	6	0.568	0.02402	0.0423	83
55	tiratricol	0.486	4	0.673	0.0251	0.0211	75
56	felodipine	0.414	7	0.522	0.02549	0.099	71
57	chlortalidone	-0.354	4	-0.673	0.0255	0.0473	75
58	metoprolol	-0.383	4	-0.673	0.0257	0.0458	75
59	pempidine	0.508	5	0.613	0.02583	0.0133	80
60	enilconazole	0.451	4	0.67	0.0264	0.0133	100
61	cloxacillin	-0.373	4	-0.67	0.02668	0.0303	50
62	clomipramine	0.541	4	0.667	0.02721	0.1326	100
63	benzamil	-0.31	6	-0.559	0.02751	0.0387	50
64	promazine	0.479	6	0.558	0.02791	0.0471	83
65	sulfamonomethoxine	-0.331	4	-0.664	0.02879	0.1258	50
66	mecamylamine	0.557	3	0.755	0.02888	0.0155	100
67	solasodine	0.461	6	0.556	0.0289	0.0284	66
68	naringenin	-0.48	4	-0.661	0.02988	0.121	75
69	astemizole	0.524	5	0.603	0.02998	0.4218	100
70	colistin	-0.279	4	-0.658	0.03113	0.0846	50
71	MG-262	0.509	3	0.747	0.03183	0.2811	100
72	chloropyrazine	-0.291	4	-0.657	0.03191	0.0455	50
73	tacrolimus	-0.302	3	-0.75	0.03209	0.0774	66
74	cephaeline	-0.246	5	-0.593	0.03228	0.4518	60
75	meteneprost	-0.504	4	-0.654	0.03348	0.1797	75
76	lasalocid	-0.446	4	-0.653	0.034	0.1574	75
77	NS-398	0.558	3	0.74	0.03431	0.0506	100
78	monorden	0.348	22	0.294	0.03526	0.2513	63
79	pinacidil	-0.267	4	-0.649	0.03607	0.0387	50
80	ramipril	-0.231	4	-0.648	0.03642	0.0112	75
81	cefaclor	-0.309	4	-0.648	0.03648	0.0952	50
82	rosiglitazone	-0.118	14	-0.363	0.03683	0.1118	50
83	DL-thiorphan	0.778	2	0.863	0.03825	0.1397	100
84	biperiden	-0.29	5	-0.581	0.03839	0.2857	60
85	trimethylcolchicinic acid	0.506	4	0.643	0.03911	0.0319	100
86	trimipramine	0.582	4	0.643	0.03949	0.0703	100
87	imidurea	0.546	3	0.727	0.0398	0.0866	100
88	meticrane	0.493	5	0.581	0.04029	0.1495	80
89	tranylcypromine	0.47	5	0.58	0.04079	0.0357	80
90	nabumetone	0.386	4	0.639	0.04122	0.039	100
91	fludrocortisone	-0.216	8	-0.466	0.04134	0.3732	62
92	pentoxifylline	-0.304	5	-0.575	0.04147	0.1567	60
93	iopromide	-0.263	4	-0.634	0.04386	0.1029	50
94	pyrithyldione	-0.323	4	-0.633	0.04424	0.1409	75
95	hexestrol	0.541	4	0.634	0.04444	0.1714	100
96	levobunolol	-0.457	4	-0.631	0.04518	0.1603	75
97	withaferin A	0.529	4	0.632	0.04534	0.3316	100
98	doxorubicin	0.536	3	0.714	0.04577	0.2458	100
99	lisinopril	0.519	3	0.714	0.04609	0.0079	100
100	indoprofen	-0.386	4	-0.629	0.04629	0.12	50
101	tubocurarine chloride	-0.451	4	-0.629	0.04673	0.0406	75
102	homochlorcyclizine	0.563	4	0.629	0.04729	0.163	100
103	furazolidone	-0.374	4	-0.627	0.0476	0.1019	75
104	labetalol	0.505	4	0.627	0.04844	0.0347	100
105	thiamphenicol	-0.258	5	-0.562	0.04918	0.2867	60
106	pivampicillin	0.574	4	0.625	0.04957	0.032	100

## Sheet: Table S20A_COAD
rank	cmap name	mean	n	enrichment	p	specificity	percent non-null
1	tanespimycin	0.528	62	0.49	0	0.0725	79
2	trichostatin A	0.321	182	0.257	0	0.7915	56
3	alvespimycin	0.641	12	0.658	4e-05	0.0058	91
4	etiocholanolone	-0.241	6	-0.781	0.00018	0	50
5	DL-thiorphan	0.921	2	0.986	0.0004	0	100
6	amantadine	-0.422	4	-0.865	0.00062	0	75
7	aciclovir	-0.254	6	-0.732	0.00073	0.0066	50
8	gabexate	-0.336	4	-0.857	0.00074	0	75
9	puromycin	0.699	4	0.83	0.00127	0.1292	100
10	sulfaquinoxaline	-0.44	3	-0.894	0.00226	0.0062	100
11	doxylamine	0.573	5	0.752	0.00228	0.016	100
12	sulfadimethoxine	-0.319	5	-0.739	0.00242	0.0222	60
13	sulfamonomethoxine	-0.321	4	-0.811	0.00251	0.0066	50
14	lasalocid	-0.289	4	-0.793	0.00368	0.0463	50
15	Prestwick-1103	-0.273	4	-0.793	0.00368	0.0199	50
16	Gly-His-Lys	-0.383	3	-0.873	0.00411	0.0149	66
17	perhexiline	0.551	4	0.776	0.00475	0.0415	100
18	monensin	-0.358	6	-0.653	0.00475	0.1138	50
19	geldanamycin	0.472	15	0.427	0.00505	0.3152	66
20	iopromide	-0.177	4	-0.768	0.00577	0.0074	50
21	cefamandole	-0.513	4	-0.748	0.00802	0.0083	75
22	blebbistatin	0.79	2	0.934	0.00821	0.0122	100
23	guanadrel	-0.32	5	-0.669	0.00917	0.058	60
24	midodrine	-0.343	5	-0.662	0.01039	0.1128	60
25	milrinone	0.715	3	0.818	0.01196	0.0159	100
26	trifluoperazine	0.325	16	0.382	0.01322	0.4567	56
27	5255229	0.721	2	0.918	0.01332	0.0105	100
28	Prestwick-857	-0.344	4	-0.713	0.01371	0.0319	75
29	5252917	0.783	2	0.916	0.01392	0.0137	100
30	CP-863187	-0.591	4	-0.712	0.014	0.0353	75
31	5224221	0.752	2	0.916	0.01404	0.2179	100
32	spaglumic acid	-0.558	2	-0.912	0.01539	0.0484	100
33	practolol	0.487	4	0.706	0.01544	0.0172	100
34	(-)-MK-801	0.55	4	0.699	0.01695	0.0158	100
35	chlorzoxazone	0.656	4	0.694	0.01846	0.0354	100
36	pseudopelletierine	0.527	4	0.69	0.0192	0.0184	100
37	scriptaid	0.552	3	0.788	0.01921	0.1806	100
38	methyldopate	-0.547	4	-0.692	0.01922	0.0511	75
39	quinpirole	-0.411	4	-0.687	0.02059	0.0444	75
40	isometheptene	-0.319	4	-0.686	0.02091	0.1035	50
41	methacholine chloride	0.674	3	0.782	0.02113	0.0165	100
42	proxyphylline	0.546	4	0.681	0.0221	0	100
43	thioridazine	0.292	20	0.323	0.02383	0.6621	55
44	felbinac	-0.304	4	-0.678	0.02385	0.227	50
45	protoveratrine A	0.632	4	0.676	0.02401	0.0148	100
46	pivmecillinam	-0.466	4	-0.676	0.02455	0.0497	75
47	pyrvinium	0.298	6	0.563	0.0261	0.3395	50
48	alpha-estradiol	0.355	16	0.355	0.02639	0.2481	56
49	tranylcypromine	0.404	5	0.609	0.02752	0.0357	80
50	clioquinol	0.511	5	0.607	0.0282	0.178	80
51	etoposide	-0.273	4	-0.665	0.02857	0.1197	75
52	flufenamic acid	0.476	6	0.555	0.02954	0.0365	83
53	vancomycin	-0.289	4	-0.66	0.03044	0.1103	50
54	pyrantel	0.371	5	0.601	0.031	0.0315	80
55	alfuzosin	0.333	5	0.598	0.032	0.0234	60
56	rifabutin	0.6	3	0.745	0.03233	0.1823	100
57	vorinostat	0.362	12	0.394	0.03283	0.6834	50
58	ciclopirox	-0.352	4	-0.653	0.03378	0.1333	75
59	pargyline	0.538	4	0.651	0.03489	0.0787	75
60	imidurea	0.543	3	0.736	0.03583	0.0787	100
61	beta-escin	0.43	6	0.54	0.03641	0.178	83
62	metronidazole	-0.312	5	-0.584	0.03677	0.1931	60
63	alcuronium chloride	0.65	2	0.865	0.0372	0.0296	100
64	methylergometrine	0.438	4	0.644	0.03863	0.0347	75
65	omeprazole	0.583	4	0.642	0.0401	0.1651	75
66	Y-27632	0.684	2	0.857	0.04119	0.0543	100
67	albendazole	0.56	3	0.722	0.04218	0.0814	100
68	folic acid	-0.362	4	-0.635	0.04279	0.1029	50
69	hyoscyamine	0.466	5	0.577	0.04288	0.0318	80
70	meptazinol	0.588	4	0.634	0.04388	0.0315	75
71	chloropyrazine	-0.31	4	-0.633	0.04406	0.0649	50
72	etacrynic acid	0.455	3	0.716	0.04499	0.0966	100
73	cloxacillin	-0.349	4	-0.631	0.04538	0.0667	50
74	trazodone	0.679	3	0.714	0.04609	0.1269	100
75	BCB000040	-0.321	4	-0.63	0.04611	0.0219	50
76	harpagoside	-0.197	4	-0.629	0.04657	0.0892	50
77	meteneprost	-0.389	4	-0.628	0.04683	0.1953	50
78	lisinopril	0.561	3	0.711	0.04719	0.0079	100
79	indoprofen	-0.294	4	-0.627	0.04782	0.1267	50
80	fludroxycortide	0.375	5	0.567	0.04874	0.0397	80
81	loperamide	0.403	6	0.52	0.04922	0.2374	83
82	flunixin	0.352	5	0.565	0.04972	0.062	60

## Sheet: Table S20A_DLBC
rank	cmap name	mean	n	enrichment	p	specificity	percent non-null
1	puromycin	0.768	4	0.941	0	0.0449	100
2	trichostatin A	0.383	182	0.396	0	0.4929	74
3	tanespimycin	0.435	62	0.368	0	0.2073	82
4	tetracycline	-0.574	5	-0.823	0.00042	0	100
5	Prestwick-1103	-0.595	4	-0.875	0.00052	0	100
6	guanadrel	-0.49	5	-0.793	0.00074	0.0073	100
7	prochlorperazine	0.476	16	0.471	0.00076	0.1748	87
8	trifluoperazine	0.455	16	0.467	0.00086	0.274	81
9	6-bromoindirubin-3'-oxime	-0.503	7	-0.681	0.00096	0.0467	85
10	etynodiol	-0.547	4	-0.842	0.00107	0	100
11	perhexiline	0.668	4	0.837	0.00109	0.0363	100
12	finasteride	-0.246	6	-0.699	0.00171	0.0366	50
13	indoprofen	-0.52	4	-0.817	0.00207	0.0333	100
14	cefamandole	-0.651	4	-0.815	0.00213	0.0083	100
15	clioquinol	0.579	5	0.743	0.00254	0.0471	100
16	naproxen	-0.305	9	-0.571	0.0026	0.0065	66
17	meptazinol	0.717	4	0.806	0.00265	0	100
18	atracurium besilate	-0.603	3	-0.884	0.0031	0	100
19	ergocalciferol	-0.506	4	-0.798	0.00328	0	100
20	Prestwick-857	-0.444	4	-0.796	0.00342	0	100
21	adiphenine	-0.56	5	-0.722	0.00356	0.2097	80
22	thioridazine	0.441	20	0.385	0.00385	0.5616	75
23	alexidine	0.567	4	0.787	0.004	0.0308	100
24	ceforanide	-0.488	4	-0.788	0.00408	0.012	100
25	diltiazem	0.583	5	0.717	0.00411	0	100
26	phenindione	0.559	4	0.781	0.00434	0.0079	100
27	cefaclor	-0.281	4	-0.78	0.00479	0.0119	50
28	mefloquine	0.623	5	0.708	0.00509	0.1128	100
29	gentamicin	-0.386	4	-0.772	0.00547	0.0658	75
30	Prestwick-675	-0.429	4	-0.769	0.00571	0.067	75
31	sulfamonomethoxine	-0.408	4	-0.768	0.00577	0.0133	75
32	sulfaquinoxaline	-0.525	3	-0.855	0.00615	0.0185	100
33	memantine	-0.405	4	-0.759	0.00686	0.0121	75
34	heptaminol	-0.378	5	-0.685	0.00715	0.0616	60
35	khellin	-0.387	5	-0.682	0.00747	0.0343	80
36	practolol	0.55	4	0.75	0.00758	0.0086	100
37	chlortalidone	-0.364	4	-0.749	0.0079	0.0059	75
38	naphazoline	0.526	5	0.683	0.00813	0	100
39	alvespimycin	0.488	12	0.457	0.00846	0.1437	83
40	cloxacillin	-0.43	4	-0.739	0.00911	0.0242	75
41	arcaine	-0.381	4	-0.737	0.00953	0.0177	75
42	spaglumic acid	-0.632	2	-0.932	0.00972	0.0161	100
43	methacholine chloride	0.649	3	0.83	0.00979	0.0083	100
44	corbadrine	0.579	4	0.731	0.01034	0.0133	100
45	pentoxifylline	-0.427	5	-0.662	0.01041	0.0448	80
46	CP-320650-01	-0.191	8	-0.538	0.01051	0.1223	50
47	methyldopate	-0.468	4	-0.731	0.01056	0.0219	75
48	harmol	-0.561	4	-0.727	0.01142	0.071	75
49	ivermectin	0.538	5	0.663	0.01166	0.1022	100
50	azapropazone	-0.637	3	-0.818	0.01194	0.0136	100
51	milrinone	0.602	3	0.816	0.01238	0.0159	100
52	4,5-dianilinophthalimide	0.647	2	0.92	0.01264	0.0407	100
53	scriptaid	0.565	3	0.815	0.0127	0.1435	100
54	cefapirin	-0.422	4	-0.718	0.01271	0.011	75
55	rosiglitazone	-0.19	14	-0.405	0.01337	0.0311	50
56	CP-944629	-0.52	4	-0.713	0.01377	0.0165	75
57	geldanamycin	0.396	15	0.39	0.01416	0.4022	80
58	prenylamine	0.625	4	0.711	0.0142	0.1872	100
59	metampicillin	-0.336	5	-0.642	0.0149	0.0797	60
60	iproniazid	-0.262	5	-0.64	0.01544	0.0301	60
61	pivmecillinam	-0.437	4	-0.706	0.0155	0.0276	75
62	amantadine	-0.566	4	-0.704	0.01576	0.0719	75
63	clomifene	0.617	4	0.704	0.01593	0.0632	100
64	sulfadoxine	0.595	3	0.801	0.0161	0.0075	100
65	Trolox C	0.514	4	0.703	0.01611	0.0081	100
66	tocainide	-0.441	4	-0.7	0.01715	0.0839	75
67	tonzonium bromide	0.545	4	0.692	0.01884	0.0612	100
68	xamoterol	-0.533	3	-0.789	0.01901	0.0411	100
69	timolol	-0.228	4	-0.693	0.01906	0.1045	50
70	calcium folinate	-0.479	5	-0.626	0.01912	0.0992	80
71	lisuride	-0.343	5	-0.626	0.01912	0.2869	60
72	MG-262	0.609	3	0.788	0.01955	0.2432	100
73	glafenine	0.601	4	0.688	0.01975	0.0426	100
74	pyrvinium	0.533	6	0.579	0.01978	0.3209	83
75	pyrithyldione	-0.39	4	-0.69	0.01987	0.0563	75
76	3-acetamidocoumarin	-0.403	4	-0.69	0.01995	0.1948	75
77	amrinone	-0.446	4	-0.689	0.02019	0.0511	75
78	atractyloside	-0.34	5	-0.622	0.02037	0.1061	60
79	CP-863187	-0.558	4	-0.685	0.02137	0.0471	75
80	sirolimus	0.195	44	0.222	0.0216	0.5542	50
81	Gly-His-Lys	-0.407	3	-0.781	0.02163	0.0597	66
82	flufenamic acid	0.523	6	0.575	0.02173	0.0292	100
83	diloxanide	-0.383	4	-0.681	0.02264	0.0714	75
84	disulfiram	0.51	5	0.621	0.02273	0.1908	100
85	trapidil	-0.317	3	-0.776	0.02299	0.0494	66
86	cloperastine	0.504	6	0.564	0.02531	0.1814	100
87	DL-thiorphan	0.662	2	0.889	0.02559	0.0882	100
88	cefalonium	-0.4	3	-0.766	0.0263	0.0217	66
89	tubocurarine chloride	-0.243	4	-0.669	0.02688	0.0203	50
90	proadifen	0.489	4	0.667	0.02729	0.0964	75
91	mebendazole	0.573	5	0.608	0.02794	0.2536	100
92	loperamide	0.539	6	0.557	0.02856	0.1717	100
93	acetylsalicylsalicylic acid	0.476	4	0.665	0.02861	0.0163	100
94	rifabutin	0.547	3	0.753	0.02946	0.1823	100
95	meteneprost	-0.541	4	-0.66	0.0301	0.1719	75
96	PF-00539745-00	-0.258	3	-0.754	0.03047	0.0963	66
97	BCB000040	-0.438	4	-0.659	0.0306	0.0146	75
98	PNU-0293363	-0.292	3	-0.752	0.03093	0.0261	66
99	myosmine	-0.165	6	-0.551	0.03111	0.1105	50
100	Prestwick-920	0.504	4	0.658	0.03139	0.0519	100
101	gabexate	-0.263	4	-0.656	0.03195	0.1558	50
102	nocodazole	0.456	6	0.548	0.03242	0.1649	83
103	nomegestrol	-0.415	3	-0.746	0.03349	0.0441	66
104	methylbenzethonium chloride	0.446	6	0.546	0.03365	0.178	100
105	chlorzoxazone	0.56	4	0.653	0.0338	0.0708	100
106	sulfadimethoxine	-0.417	5	-0.59	0.0338	0.2519	80
107	folic acid	-0.489	4	-0.652	0.03443	0.0809	75
108	Prestwick-1082	-0.453	3	-0.743	0.03463	0.1721	66
109	flunarizine	0.563	4	0.651	0.03475	0.0544	100
110	(+)-chelidonine	0.539	4	0.651	0.03499	0.033	100
111	5255229	0.648	2	0.868	0.03573	0.0316	100
112	vorinostat	0.292	12	0.388	0.03678	0.6935	66
113	imidurea	0.51	3	0.734	0.0368	0.0787	100
114	harpagoside	-0.381	4	-0.646	0.0371	0.0764	75
115	lansoprazole	-0.33	4	-0.646	0.0375	0.1026	75
116	bretylium tosilate	-0.352	4	-0.643	0.03909	0.0495	75
117	arecoline	-0.245	4	-0.641	0.03965	0.1296	50
118	calmidazolium	0.615	2	0.86	0.03972	0.1632	100
119	glibenclamide	0.515	4	0.641	0.04042	0.0354	100
120	lidocaine	-0.277	5	-0.577	0.04055	0.0565	60
121	decamethonium bromide	-0.268	4	-0.639	0.04066	0.0177	50
122	ornidazole	0.516	5	0.58	0.04071	0.0248	100
123	ampicillin	-0.411	4	-0.637	0.04187	0.0377	75
124	benzocaine	-0.254	4	-0.637	0.04187	0.1611	50
125	tiletamine	-0.264	4	-0.636	0.04229	0.0739	50
126	5252917	0.695	2	0.855	0.04277	0.089	100
127	mianserin	0.473	5	0.577	0.04288	0.0611	100
128	bambuterol	-0.29	4	-0.635	0.04303	0.0311	50
129	Prestwick-559	0.55	3	0.72	0.04335	0.1088	100
130	Prestwick-692	-0.26	4	-0.634	0.04343	0.2041	50
131	2-aminobenzenesulfonamide	-0.392	4	-0.632	0.0444	0.1667	75
132	nimesulide	0.492	4	0.634	0.04444	0.0319	75
133	imipramine	0.535	4	0.633	0.04496	0.0571	100
134	trazodone	0.567	3	0.712	0.04655	0.1269	100
135	monorden	0.271	22	0.283	0.04719	0.3102	54
136	levonorgestrel	0.395	6	0.523	0.04728	0.1861	83
137	emetine	0.582	4	0.629	0.04729	0.3803	100
138	fendiline	0.498	3	0.709	0.04845	0.0966	100
139	chloropyrazine	-0.264	4	-0.625	0.04864	0.0844	50
140	viomycin	-0.481	4	-0.625	0.0487	0.3309	75
141	blebbistatin	0.62	2	0.843	0.04966	0.122	100

## Sheet: Table S20A_ESCA
rank	cmap name	mean	n	enrichment	p	specificity	percent non-null
1	trichostatin A	0.357	182	0.218	0	0.8626	69
2	fludrocortisone	-0.47	8	-0.674	0.0005	0.0282	87
3	LY-294002	0.406	61	0.252	0.00052	0.4765	65
4	tanespimycin	0.425	62	0.25	0.00056	0.5233	77
5	gentamicin	-0.626	4	-0.866	0.00062	0.0066	100
6	cefamandole	-0.626	4	-0.86	0.00068	0	100
7	adiphenine	-0.779	5	-0.801	0.00068	0.0887	100
8	monensin	-0.572	6	-0.737	0.0007	0.0244	83
9	Prestwick-1082	-0.69	3	-0.924	0.00074	0.0164	100
10	atractyloside	-0.58	5	-0.794	0.00074	0.0076	100
11	heptaminol	-0.609	5	-0.793	0.00074	0.0137	100
12	timolol	-0.635	4	-0.855	0.0008	0	100
13	DL-thiorphan	0.878	2	0.976	0.00087	0	100
14	guanadrel	-0.552	5	-0.783	0.00088	0.0073	100
15	sulfadimethoxine	-0.609	5	-0.781	0.0009	0.0074	100
16	guanabenz	-0.594	5	-0.777	0.00096	0.0154	100
17	etiocholanolone	-0.354	6	-0.716	0.00107	0.0455	66
18	calcium folinate	-0.581	5	-0.773	0.00108	0.0153	100
19	biperiden	-0.531	5	-0.76	0.00148	0.0612	100
20	aciclovir	-0.371	6	-0.707	0.00153	0.0133	66
21	Prestwick-1103	-0.598	4	-0.817	0.00209	0	100
22	CP-320650-01	-0.196	8	-0.613	0.00211	0.0576	50
23	PHA-00745360	-0.417	8	-0.611	0.00225	0.0543	75
24	tranexamic acid	-0.46	5	-0.723	0.00348	0.0738	80
25	amantadine	-0.562	4	-0.792	0.00374	0.0196	100
26	trimethobenzamide	-0.469	5	-0.718	0.00384	0.0336	80
27	vincamine	-0.229	6	-0.666	0.00391	0.0412	50
28	Prestwick-692	-0.61	4	-0.79	0.00398	0.0272	100
29	phenoxybenzamine	0.64	4	0.785	0.0041	0.2871	100
30	midodrine	-0.463	5	-0.709	0.00449	0.0752	80
31	viomycin	-0.671	4	-0.783	0.00454	0.1151	100
32	Gly-His-Lys	-0.707	3	-0.866	0.00479	0.0224	100
33	genistein	-0.213	17	-0.409	0.0049	0.1429	52
34	pheneticillin	-0.543	4	-0.779	0.00491	0.0131	100
35	nadolol	-0.585	4	-0.768	0.00577	0.0769	100
36	vinblastine	-0.715	3	-0.856	0.00587	0.0611	100
37	sirolimus	0.414	44	0.252	0.00594	0.4518	63
38	merbromin	-0.485	5	-0.692	0.00619	0.0488	80
39	ciclopirox	-0.441	4	-0.764	0.00633	0.0476	100
40	levonorgestrel	0.608	6	0.634	0.00733	0.0465	100
41	mebendazole	0.626	5	0.687	0.00743	0.1292	100
42	3-acetamidocoumarin	-0.606	4	-0.751	0.00768	0.1234	100
43	blebbistatin	0.786	2	0.937	0.00777	0.0122	100
44	lasalocid	-0.574	4	-0.749	0.00798	0.0648	100
45	gabexate	-0.517	4	-0.748	0.00812	0.0649	100
46	ribavirin	-0.511	4	-0.746	0.00822	0.0461	100
47	alprostadil	-0.43	7	-0.587	0.00826	0.032	71
48	lisuride	-0.561	5	-0.669	0.00917	0.2131	80
49	pyrvinium	0.602	6	0.62	0.00928	0.2558	100
50	chenodeoxycholic acid	-0.404	4	-0.734	0.01005	0.0846	75
51	thioperamide	-0.448	5	-0.662	0.01035	0.0746	80
52	PF-00539745-00	-0.558	3	-0.824	0.01094	0.0741	100
53	meteneprost	-0.559	4	-0.729	0.01104	0.0391	75
54	milrinone	0.718	3	0.822	0.01128	0.0159	100
55	diethylstilbestrol	-0.249	6	-0.611	0.0113	0.0328	50
56	tolnaftate	-0.482	5	-0.658	0.01135	0.0458	80
57	alpha-estradiol	0.505	16	0.386	0.01187	0.1473	87
58	levomepromazine	-0.493	4	-0.712	0.01396	0.0374	75
59	clofazimine	-0.365	5	-0.644	0.0142	0.0539	80
60	dipyridamole	0.588	6	0.596	0.01422	0.0738	100
61	haloperidol	-0.021	32	-0.272	0.01446	0.0252	50
62	tretinoin	0.416	22	0.322	0.01506	0.2614	81
63	isometheptene	-0.388	4	-0.705	0.0156	0.0828	75
64	methylergometrine	0.667	4	0.702	0.01635	0.0139	100
65	metronidazole	-0.472	5	-0.636	0.01638	0.0897	80
66	medrysone	0.575	6	0.588	0.01659	0.1654	83
67	isoflupredone	-0.703	3	-0.795	0.01749	0.2	100
68	thioridazine	0.43	20	0.334	0.0178	0.6484	80
69	vorinostat	0.458	12	0.421	0.01814	0.6181	75
70	chlorpromazine	0.461	19	0.341	0.01855	0.0897	78
71	methyldopate	-0.476	4	-0.692	0.01922	0.0511	75
72	metampicillin	-0.437	5	-0.621	0.02053	0.087	60
73	iloprost	-0.532	3	-0.783	0.02079	0.0438	100
74	prochlorperazine	0.479	16	0.362	0.02168	0.4272	87
75	pentoxifylline	-0.442	5	-0.618	0.02219	0.1045	60
76	iproniazid	-0.408	5	-0.617	0.02243	0.0526	80
77	meticrane	0.676	5	0.621	0.02289	0.0935	100
78	Prestwick-1084	0.602	4	0.679	0.02298	0.0412	75
79	clorsulon	-0.521	4	-0.68	0.02325	0.0567	75
80	sulfamonomethoxine	-0.562	4	-0.677	0.02407	0.0861	75
81	canadine	-0.285	4	-0.676	0.02445	0.1342	50
82	ketotifen	-0.448	4	-0.675	0.02505	0.0574	75
83	iohexol	-0.515	4	-0.674	0.02512	0.0511	75
84	tacrolimus	-0.603	3	-0.767	0.02588	0.0774	100
85	diphenhydramine	-0.432	5	-0.609	0.02597	0.1111	80
86	cloperastine	0.561	6	0.556	0.02902	0.1865	100
87	econazole	-0.376	4	-0.662	0.02962	0.1111	75
88	colistin	-0.434	4	-0.66	0.03036	0.0846	75
89	clioquinol	0.508	5	0.601	0.03072	0.1833	80
90	carbimazole	-0.467	3	-0.752	0.03113	0.089	100
91	pioglitazone	-0.178	11	-0.417	0.03134	0.2	63
92	felbinac	-0.485	4	-0.656	0.03195	0.2766	75
93	podophyllotoxin	-0.456	4	-0.656	0.03235	0.2745	75
94	chlorzoxazone	0.614	4	0.654	0.0333	0.0708	75
95	vancomycin	-0.451	4	-0.653	0.03416	0.1172	75
96	sulfaquinoxaline	-0.416	3	-0.744	0.03429	0.037	100
97	ampyrone	-0.343	5	-0.587	0.03527	0.0556	60
98	alvespimycin	0.48	12	0.389	0.036	0.2931	75
99	Prestwick-691	-0.451	3	-0.739	0.0364	0.2105	66
100	bromocriptine	0.569	5	0.588	0.03679	0.0922	100
101	dapsone	-0.448	5	-0.582	0.03795	0.1603	80
102	folic acid	-0.505	4	-0.642	0.03945	0.0882	75
103	apigenin	0.693	4	0.642	0.03995	0.2969	100
104	promazine	0.485	6	0.533	0.04074	0.0706	100
105	khellin	-0.424	5	-0.576	0.04137	0.1164	60
106	naproxen	-0.248	9	-0.44	0.04266	0.1242	66
107	levobunolol	-0.45	4	-0.635	0.04279	0.1603	75
108	pyrithyldione	-0.498	4	-0.635	0.04279	0.1409	75
109	iopromide	-0.459	4	-0.635	0.04335	0.1029	75
110	chlortalidone	-0.412	4	-0.633	0.04418	0.0888	75
111	rottlerin	0.657	3	0.715	0.04527	0.228	100
112	iopamidol	-0.317	4	-0.63	0.04597	0.1177	50
113	chloropyrazine	-0.329	4	-0.63	0.04611	0.0844	50
114	cinchocaine	0.543	5	0.57	0.04652	0.0661	100
115	flufenamic acid	0.57	6	0.523	0.04704	0.0511	100
116	5252917	0.711	2	0.847	0.0475	0.0959	100
117	metoprolol	-0.34	4	-0.626	0.04824	0.0534	75
118	cloxacillin	-0.317	4	-0.625	0.0487	0.097	50
119	ikarugamycin	-0.496	3	-0.712	0.04875	0.0833	66
120	CP-863187	-0.424	4	-0.625	0.04886	0.1	75
121	quinostatin	0.718	2	0.844	0.04915	0.221	100
122	diltiazem	0.656	5	0.566	0.04948	0.0583	100
123	penbutolol	-0.34	3	-0.71	0.0496	0.0667	66

## Sheet: Table S20A_HNSC
rank	cmap name	mean	n	enrichment	p	specificity	percent non-null
1	sirolimus	0.409	44	0.439	0	0.1024	65
2	LY-294002	0.39	61	0.339	0	0.255	68
3	trichostatin A	0.328	182	0.229	0	0.8341	58
4	prochlorperazine	0.506	16	0.55	6e-05	0.0825	81
5	tanespimycin	0.354	62	0.268	8e-05	0.4663	51
6	CP-863187	-0.628	4	-0.916	0.0001	0	100
7	xamoterol	-0.661	3	-0.945	0.00028	0	100
8	naringenin	-0.609	4	-0.888	0.00036	0	100
9	nadolol	-0.551	4	-0.875	0.00052	0.0077	100
10	gentamicin	-0.543	4	-0.871	0.00058	0	100
11	folic acid	-0.599	4	-0.847	0.00101	0	100
12	phenindione	0.634	4	0.833	0.00115	0	100
13	geldanamycin	0.424	15	0.458	0.00202	0.2391	73
14	acemetacin	-0.476	4	-0.814	0.00223	0	100
15	azapropazone	-0.567	3	-0.892	0.0024	0	100
16	calmidazolium	0.767	2	0.958	0.00308	0.0474	100
17	adiphenine	-0.519	5	-0.729	0.00308	0.1694	80
18	quinostatin	0.742	2	0.957	0.00324	0.0884	100
19	Gly-His-Lys	-0.607	3	-0.871	0.00431	0.0224	100
20	piretanide	-0.432	4	-0.783	0.0044	0.0222	75
21	Prestwick-967	-0.462	4	-0.779	0.00497	0.0165	75
22	6-bromoindirubin-3'-oxime	-0.35	7	-0.594	0.00701	0.1075	71
23	pyrvinium	0.535	6	0.63	0.00791	0.2326	83
24	loperamide	0.591	6	0.624	0.00864	0.0859	100
25	cinchonidine	-0.41	4	-0.743	0.00871	0.0069	75
26	praziquantel	-0.239	4	-0.741	0.00891	0	50
27	estropipate	-0.427	4	-0.739	0.00905	0	75
28	terfenadine	0.737	3	0.834	0.00911	0.1527	100
29	CP-645525-01	0.654	3	0.833	0.00937	0.0169	100
30	cotinine	0.524	6	0.617	0.00957	0	100
31	genistein	-0.168	17	-0.381	0.00991	0.2214	52
32	5279552	-0.612	2	-0.929	0.0105	0.0119	100
33	amrinone	-0.423	4	-0.731	0.01058	0.0398	75
34	desoxycortone	-0.326	4	-0.73	0.01064	0.0099	50
35	milrinone	0.622	3	0.822	0.01134	0.0159	100
36	etynodiol	-0.365	4	-0.726	0.01154	0.0133	75
37	clioquinol	0.628	5	0.66	0.01226	0.1257	100
38	tetracycline	-0.456	5	-0.653	0.01244	0.0503	80
39	trifluoperazine	0.439	16	0.381	0.01342	0.4567	68
40	resveratrol	0.391	9	0.493	0.01475	0.3333	66
41	desipramine	0.503	4	0.708	0.01512	0.0474	100
42	calcium folinate	-0.493	5	-0.635	0.01656	0.084	80
43	lysergol	0.59	4	0.692	0.01876	0.051	100
44	methotrexate	0.324	8	0.508	0.01942	0.1024	75
45	ketotifen	-0.433	4	-0.691	0.01946	0.0328	75
46	thioridazine	0.407	20	0.329	0.02016	0.6575	65
47	phenazopyridine	0.523	4	0.685	0.02097	0.0974	100
48	blebbistatin	0.697	2	0.899	0.02119	0.0366	100
49	bupropion	0.499	4	0.682	0.022	0	100
50	iohexol	-0.38	4	-0.682	0.0223	0.0511	75
51	midodrine	-0.45	5	-0.617	0.02257	0.1729	80
52	ebselen	0.629	3	0.774	0.02334	0.1081	100
53	doxylamine	0.503	5	0.618	0.02413	0.048	100
54	PHA-00745360	-0.292	8	-0.495	0.02431	0.2636	62
55	tetrahydroalstonine	-0.242	4	-0.673	0.0257	0	50
56	ikarugamycin	-0.398	3	-0.767	0.026	0.0606	66
57	dipyridamole	0.355	6	0.562	0.02616	0.0805	66
58	ivermectin	0.401	5	0.609	0.02762	0.129	80
59	dorzolamide	0.462	4	0.665	0.02851	0	100
60	5252917	0.699	2	0.879	0.02936	0.0548	100
61	ethionamide	-0.371	3	-0.755	0.02997	0.05	66
62	ampicillin	-0.463	4	-0.658	0.03133	0.0189	75
63	betaxolol	0.524	4	0.653	0.03374	0.0086	100
64	sulfamonomethoxine	-0.395	4	-0.652	0.03467	0.1391	75
65	piroxicam	0.503	4	0.651	0.03481	0.0355	100
66	albendazole	0.619	3	0.738	0.03537	0.064	100
67	convolamine	-0.308	4	-0.649	0.03585	0.027	75
68	corbadrine	0.534	4	0.649	0.03589	0.053	100
69	oxytetracycline	0.501	3	0.73	0.0389	0.0552	100
70	fenoterol	0.526	3	0.726	0.04008	0.0629	100
71	BCB000040	-0.476	4	-0.64	0.04032	0.0219	75
72	0297417-0002B	0.641	3	0.724	0.04132	0.2	100
73	pilocarpine	-0.41	4	-0.633	0.04402	0.1438	75
74	thioguanosine	0.5	4	0.634	0.04416	0.2471	100
75	diltiazem	0.485	5	0.571	0.04588	0.05	80
76	benzethonium chloride	0.613	3	0.713	0.04631	0.1	100
77	terazosin	-0.363	4	-0.629	0.04645	0.1567	75
78	oxaprozin	0.468	6	0.523	0.0474	0.0353	83
79	norcyclobenzaprine	0.53	4	0.627	0.04844	0.1639	75
80	netilmicin	-0.283	4	-0.625	0.04886	0.0698	75
81	pseudopelletierine	0.512	4	0.626	0.04896	0.0275	100
82	dexamethasone	-0.245	8	-0.456	0.04934	0.0365	62

## Sheet: Table S20A_KICH
rank	cmap name	mean	n	enrichment	p	specificity	percent non-null
1	tanespimycin	0.339	62	0.358	0	0.2228	74
2	meteneprost	-0.663	4	-0.901	0.00016	0	100
3	Prestwick-1103	-0.519	4	-0.891	0.0003	0	100
4	myosmine	-0.243	6	-0.753	0.00046	0	66
5	etiocholanolone	-0.337	6	-0.75	0.0005	0.013	83
6	amantadine	-0.666	4	-0.875	0.00052	0	100
7	finasteride	-0.257	6	-0.734	0.0007	0.0244	50
8	puromycin	0.549	4	0.849	0.00074	0.118	100
9	guanadrel	-0.369	5	-0.793	0.00074	0.0073	80
10	alvespimycin	0.448	12	0.53	0.00102	0.0747	91
11	DL-thiorphan	0.647	2	0.971	0.00133	0	100
12	tocainide	-0.534	4	-0.819	0.00199	0	100
13	diloxanide	-0.491	4	-0.815	0.00215	0	100
14	doxylamine	0.504	5	0.742	0.00264	0.024	100
15	Prestwick-967	-0.469	4	-0.805	0.0028	0.011	100
16	benzocaine	-0.511	4	-0.805	0.0028	0.0134	100
17	meptazinol	0.67	4	0.802	0.00288	0	100
18	corbadrine	0.486	4	0.8	0.003	0.0133	100
19	gabexate	-0.399	4	-0.784	0.00438	0.0325	75
20	chlorzoxazone	0.49	4	0.779	0.00444	0.0089	100
21	pioglitazone	-0.238	11	-0.503	0.00444	0.0849	54
22	pyrvinium	0.458	6	0.658	0.00473	0.1814	100
23	perhexiline	0.482	4	0.774	0.00491	0.0415	100
24	fludrocortisone	-0.216	8	-0.565	0.00602	0.1761	50
25	PNU-0251126	-0.399	6	-0.641	0.00614	0.0267	83
26	iloprost	-0.543	3	-0.853	0.00637	0.0063	100
27	CP-320650-01	-0.235	8	-0.561	0.00654	0.1007	62
28	tolnaftate	-0.361	5	-0.688	0.00661	0.0261	60
29	sulfamonomethoxine	-0.294	4	-0.761	0.00664	0.0199	50
30	guaifenesin	-0.375	6	-0.637	0.00667	0.0103	83
31	metampicillin	-0.379	5	-0.681	0.00753	0.0362	80
32	sulfadiazine	0.46	5	0.686	0.00767	0	100
33	cefamandole	-0.387	4	-0.75	0.00776	0.0083	75
34	timolol	-0.257	4	-0.748	0.00802	0.0373	50
35	alexidine	0.498	4	0.742	0.00843	0.0461	100
36	pentoxifylline	-0.426	5	-0.672	0.00887	0.0373	80
37	ivermectin	0.459	5	0.677	0.00907	0.0914	100
38	arecoline	-0.246	4	-0.739	0.00925	0.0432	50
39	gentamicin	-0.245	4	-0.738	0.00935	0.079	50
40	flufenamic acid	0.427	6	0.617	0.00959	0.0219	100
41	procainamide	0.479	4	0.729	0.01076	0.0084	100
42	CP-944629	-0.478	4	-0.728	0.01112	0.011	75
43	harmol	-0.512	4	-0.728	0.01118	0.071	75
44	xamoterol	-0.547	3	-0.822	0.01128	0.0343	100
45	bretylium tosilate	-0.34	4	-0.724	0.01186	0.0165	75
46	ornidazole	0.451	5	0.662	0.01186	0	100
47	midodrine	-0.313	5	-0.654	0.0121	0.1278	80
48	cefalonium	-0.43	3	-0.816	0.0123	0	100
49	practolol	0.427	4	0.719	0.01253	0.0172	100
50	prenylamine	0.469	4	0.719	0.01253	0.1773	100
51	phenindione	0.465	4	0.716	0.01325	0.0079	100
52	Prestwick-675	-0.25	4	-0.715	0.01339	0.1237	50
53	lisuride	-0.38	5	-0.647	0.01348	0.2459	80
54	CP-863187	-0.564	4	-0.714	0.01369	0.0353	75
55	metanephrine	0.397	5	0.651	0.0143	0.0194	100
56	5182598	-0.57	2	-0.916	0.01439	0.1006	100
57	sulfadoxine	0.514	3	0.807	0.01456	0.0075	100
58	rottlerin	0.513	3	0.805	0.0149	0.1503	100
59	3-acetamidocoumarin	-0.265	4	-0.706	0.01554	0.1623	50
60	ribavirin	-0.41	4	-0.701	0.01649	0.079	75
61	methacholine chloride	0.584	3	0.798	0.01691	0.0165	100
62	thioridazine	0.235	20	0.336	0.01693	0.6393	60
63	tetracycline	-0.331	5	-0.633	0.01706	0.0566	60
64	methyldopate	-0.502	4	-0.698	0.01747	0.0438	75
65	glibenclamide	0.444	4	0.695	0.018	0.0089	100
66	levobunolol	-0.224	4	-0.694	0.01872	0.109	50
67	cloxacillin	-0.31	4	-0.689	0.02005	0.0303	50
68	blebbistatin	0.592	2	0.901	0.0202	0.0366	100
69	5224221	0.566	2	0.9	0.02064	0.2458	100
70	sulfadimethoxine	-0.43	5	-0.621	0.02079	0.2296	80
71	tonzonium bromide	0.422	4	0.686	0.02085	0.0612	100
72	Gly-His-Lys	-0.346	3	-0.781	0.02141	0.0597	66
73	milrinone	0.501	3	0.778	0.02209	0.0318	100
74	chlortalidone	-0.403	4	-0.682	0.02226	0.0414	75
75	furazolidone	-0.311	4	-0.682	0.02244	0.0382	75
76	Trolox C	0.43	4	0.679	0.02318	0.0081	100
77	bethanechol	-0.267	4	-0.68	0.02325	0	50
78	diltiazem	0.443	5	0.62	0.02331	0.0083	100
79	calcium folinate	-0.33	5	-0.614	0.02347	0.1145	60
80	5255229	0.554	2	0.893	0.02394	0.0158	100
81	benzathine benzylpenicillin	-0.323	4	-0.674	0.02522	0.1022	50
82	spaglumic acid	-0.586	2	-0.884	0.0269	0.0645	100
83	nadolol	-0.277	4	-0.664	0.02861	0.2539	50
84	Prestwick-691	-0.293	3	-0.758	0.0291	0.1711	66
85	albendazole	0.512	3	0.755	0.02916	0.0291	100
86	ketotifen	-0.32	4	-0.662	0.02952	0.0738	50
87	betulinic acid	-0.369	4	-0.66	0.03036	0.0968	50
88	imidurea	0.473	3	0.75	0.03099	0.063	100
89	geldanamycin	0.252	15	0.359	0.0316	0.4891	73
90	pivampicillin	0.464	4	0.658	0.03171	0.032	100
91	adiphenine	-0.363	5	-0.586	0.03553	0.4032	60
92	homochlorcyclizine	0.495	4	0.649	0.03599	0.1359	100
93	butyl hydroxybenzoate	0.265	5	0.588	0.03679	0.0364	80
94	vanoxerine	-0.248	4	-0.646	0.03744	0.05	50
95	pyrithyldione	-0.253	4	-0.645	0.03774	0.1197	50
96	pivmecillinam	-0.458	4	-0.644	0.03821	0.0663	75
97	fenoterol	0.47	3	0.73	0.0389	0.0629	100
98	hycanthone	-0.409	4	-0.64	0.04032	0.0504	75
99	corynanthine	0.547	3	0.726	0.04046	0.0625	100
100	ciclosporin	-0.307	6	-0.533	0.04164	0.06	66
101	arcaine	-0.279	4	-0.637	0.04168	0.0471	50
102	felbinac	-0.265	4	-0.637	0.04176	0.2837	50
103	flunarizine	0.407	4	0.636	0.04291	0.0748	75
104	2-aminobenzenesulfonamide	-0.282	4	-0.634	0.04368	0.1667	50
105	mefexamide	-0.352	4	-0.634	0.0438	0.0537	75
106	etofylline	0.352	5	0.574	0.04432	0.0164	80
107	Prestwick-692	-0.296	4	-0.632	0.04448	0.2109	50
108	mianserin	0.369	5	0.572	0.04552	0.0722	80
109	rifabutin	0.463	3	0.714	0.04609	0.224	100
110	molindone	0.494	4	0.63	0.04637	0.05	75
111	felodipine	0.293	7	0.486	0.0473	0.1535	57
112	pyrimethamine	0.434	5	0.569	0.04738	0.1049	80
113	BCB000040	-0.406	4	-0.628	0.0474	0.0292	75
114	iohexol	-0.425	4	-0.626	0.04846	0.1022	75
115	STOCK1N-35874	-0.437	2	-0.843	0.04927	0.0861	100

[truncated: 23 more sheets: Table S20A_KIRC, Table S20A_KIRP, Table S20A_LAML, Table S20A_LGG, Table S20A_LIHC, Table S20A_LUAD, Table S20A_LUSC, Table S20A_MESO, Table S20A_OV, Table S20A_PAAD, Table S20A_PCPG, Table S20A_PRAD, Table S20A_READ, Table S20A_SARC, Table S20A_SKCM, Table S20A_STAD, Table S20A_TGCT, Table S20A_THCA, Table S20A_THYM, Table S20A_UCEC …]
